# Supplementary material for: A fluorescent and colorimetric probe specific for palladium detection
Source: Royal Society of Chemistry journal article supplement (doi:10.1039/b916915f), 2009-12-15
Supplement: b916915f.pdf [file b916915f.pdf]

## Electronic Supplementary Information For

### A Fluorescent and Colorimetric Probe Specific for Palladium Detection

Honglin Li, Jiangli Fan, Jianjun Du, Kexin Guo, Shiguo Sun, Xiaojian Liu, Xiaojun Peng\*

State Key Laboratory of Fine Chemicals, Dalian University of Technology, Dalian 116012, China.  
Fax: +86-411-3989-3906; Tel: +86-411-3989-3899; E-mail: [pengxj@dlut.edu.cn](mailto:pengxj@dlut.edu.cn)

#### Materials and general methods:

All solvents used were of analytical grade. Analyte solutions were prepared from KCl, NaCl, NH<sub>4</sub>Cl, CaCl<sub>2</sub>, BaCl<sub>2</sub>·2H<sub>2</sub>O, MgCl<sub>2</sub>·6H<sub>2</sub>O, CdCl<sub>2</sub>·2.5H<sub>2</sub>O, FeCl<sub>3</sub>·6H<sub>2</sub>O, CrCl<sub>3</sub>·6H<sub>2</sub>O, MnCl<sub>2</sub>·5H<sub>2</sub>O, NiCl<sub>2</sub>·6H<sub>2</sub>O, CoCl<sub>2</sub>·6H<sub>2</sub>O, PbCl<sub>2</sub>, LaCl<sub>3</sub>·7H<sub>2</sub>O, HgCl<sub>2</sub>, Cu(NO<sub>3</sub>)<sub>2</sub>·2.5H<sub>2</sub>O, Zn(NO<sub>3</sub>)<sub>2</sub>·6H<sub>2</sub>O by separately dissolved in distilled water, 2.5 mM for PbCl<sub>2</sub> and HgCl<sub>2</sub>, 25.0 mM for other cations. A 10.0 mM solution of **RPd1** (26.8 mg, 0.05 mmol) was prepared in DMSO (5 mL) and stored in a refrigerator for use. A 100 mM solution of PPh<sub>3</sub> (262.3 mg, 1.00 mmol) was prepared in DMSO (10 mL). A 5.0 mM stock solution of PdCl<sub>2</sub> (8.9 mg, 0.05 mmol) was prepared in 75:25 MeOH/brine (10 mL). Further dilution of the 5.0 mM stock solution of PdCl<sub>2</sub> with MeOH was done to prepare the 1.0 mM and 100.0 μM stock solutions. A 50.0 μM solution of PtCl<sub>2</sub> (3.32 mg, 0.0125 mmol) was prepared in EtOH/H<sub>2</sub>O (1 : 1, v/v, 250 mL) solution, directly used for analysis. A 5.0 mM solution of Pd(OAc)<sub>2</sub> (5.61 mg, 0.025 mmol) was prepared in acetone (5mL). A 1.0 mM solution of Pd(PPh<sub>3</sub>)<sub>4</sub> (11.6 mg, 0.010 mmol, freshly synthesized from PdCl<sub>2</sub>, with colour of light yellow) was prepared in 95 : 5 MeOH/DMF (10 mL). Measurements were done after addition of different cations to **RPd1** solutions overnight.

<sup>1</sup>H-NMR, <sup>13</sup>C-NMR and <sup>1</sup>H-<sup>1</sup>H COSY spectras were recorded on a VARIAN INOVA-400 spectrometer chemical shifts reported as ppm (in CDCl<sub>3</sub>, TMS as internal standard). Mass spectrometry data were obtained with a HP1100LC/MSD mass spectrometer and a LC/Q-TOF MS spectrometer. Fluorescence measurements were performed on a VAEIAN CARY Eclipse Fluorescence Spectrophotometer (Serial No. FL0812-M018) and the slit width was 5 nm for excitation and 2.5 nm for emission. All pH measurements were made with a Model PHS-3C meter.

The quantum yield of **RPd1**, **RPd1**-Pd<sup>2+</sup> and **RPd1**-Pd<sup>0</sup>/PPh<sub>3</sub> were determined according to the method bellow.

$$\varphi_u = \frac{(\varphi_s)(FA_u)(A_s)(\lambda_{exs})(\eta_u^2)}{(FA_s)(A_u)(\lambda_{exu})(\eta_s^2)}$$

Where  $\phi$  is fluorescence quantum yield; FA is integrated area under the corrected emission spectra; A is the absorbance at the excitation wavelength;  $\lambda_{\text{ex}}$  is the excitation wavelength;  $n$  is the refractive index of the solution; the subscripts u and s refer to the unknown and the standard, respectively. We chose rhodamine B as standard, which has the fluorescence quantum yield of 0.49 in ethanol.<sup>1</sup>

### Reactors contamination experimental procedure.

To four 10 mL round-bottom flasks were added  $\text{K}_2\text{CO}_3$  (10 mg) and THF (3 mL). To three of the four flasks were then added  $\text{PdCl}_2$ ,  $\text{Pd}(\text{AcO})_2$  and  $\text{Pd}(\text{PPh}_3)_4$  (10 mg respectively). The mixtures in the three flasks were stirred at room temperature for 1 h, and then all chemicals were removed. The four flasks were brushing with detergent, washing with water and acetone three times.

To the four washed flasks were added 5 mL of **RPd1** aqueous solution (10  $\mu\text{M}$ ). The solutions were stirred at room temperature overnight, then fluorescence measurements were performed (Slit width was 5 nm both for excitation and emission).

### Synthetic procedures:

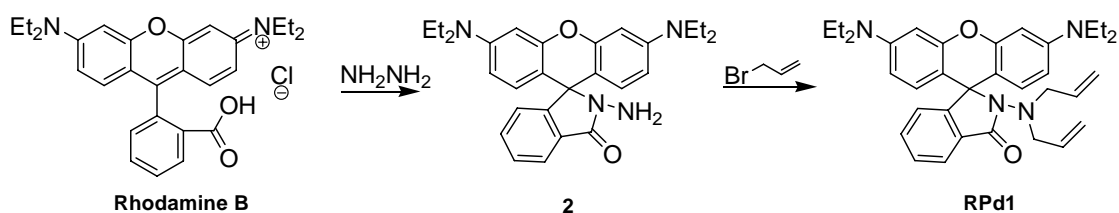

**Scheme S1.** Synthesis of **RPd1**.

### Synthesis of 2

Rhodamine hydrazide (**2**) was synthesized from rhodamine B by the procedure published in literature.<sup>2</sup>

### Synthesis of RPd1

**2** (300.0 mg, 0.66 mmol),  $\text{K}_2\text{CO}_3$  (96.6 mg, 0.7 mmol) was dissolved in 20 mL acetic ether in a 50-mL flask. 1.0 mL (excess) 3-bromopropene was then added dropwise with vigorous stirring. The mixture was refluxed overnight. After removal of acetic ether under vacuum, the residue was purified by flash chromatography with  $\text{CH}_2\text{Cl}_2$ /acetic ether as eluent to give the white powder **RPd1** (159.3 mg, yield: 45.0%). TLC analysis:  $R_f = 0.6$  in 5.0% acetic ether in  $\text{CH}_2\text{Cl}_2$ .

<sup>1</sup>**H-NMR** (400 MHz,  $\text{CDCl}_3$ ),  $\delta_{\text{H}}$  (ppm): 7.88 (d, 1H,  $J = 7.6$  Hz,  $\text{C}_6\text{H}_4$ ), 7.51 (m, 2H,  $J$

= 4.8 Hz, C<sub>6</sub>H<sub>4</sub>), 7.21 (d, 1H, *J* = 6.8 Hz, C<sub>6</sub>H<sub>4</sub>), 6.44 (s, 2H, Xanthene-H), 6.36 (d, 2H, *J* = 8.8 Hz, Xanthene-H), 6.26 (d, 2H, *J* = 6.8 Hz, Xanthene-H), 5.09 (m, 2H,CH), 4.85 (d, 2H, *J* = 16.8 Hz, CH<sub>2</sub>), 4.72 (d, 2H, *J* = 10.0 Hz, CH<sub>2</sub>), 3.50 (s, 2H, CH<sub>2</sub>), 3.35 (q, 8H, *J* = 7.2 Hz, CH<sub>2</sub>), 3.31 (s, 2H, CH<sub>2</sub>), 1.15 (t, 12H, *J* = 7.2 Hz, CH<sub>3</sub>); <sup>13</sup>C NMR (100 MHz, CDCl<sub>3</sub>), δ<sub>C</sub> (ppm): 165.97, 155.01, 149.30, 149.15, 135.89, 133.85, 132.80, 129.31, 128.35, 124.44, 122.63, 116.67, 107.75, 107.18, 98.50, 66.15, 58.58, 45.05, 12.36; **Q-TOF MS**: [M+H]<sup>+</sup> 537.3230; found 537.3223.

## Experimental procedures

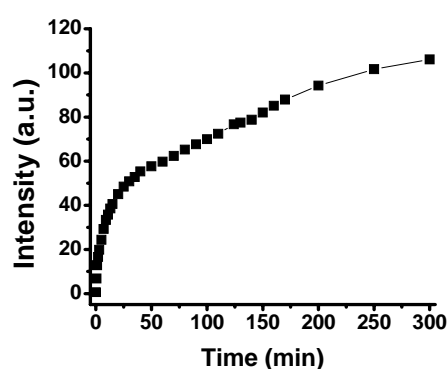

**Fig. S1.** Time dependent fluorescence intensity (at 580 nm) changes of **RPd1** (10 μM) with 1.0 equiv of Pd<sup>2+</sup> in ethanol/H<sub>2</sub>O (1:1, v/v, 25 °C), λ<sub>ex</sub> = 530 nm.

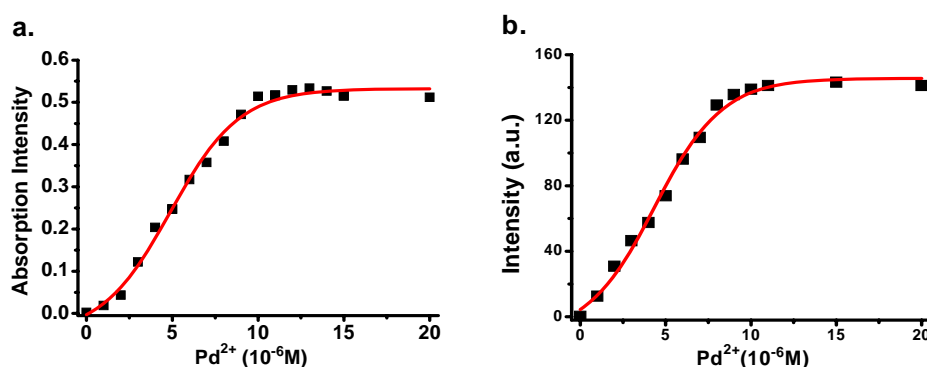

**Fig. S2.** Absorption (a, at 560 nm) and fluorescence (b, at 580 nm) intensities of **RPd1** (10 μM) upon addition of Pd<sup>2+</sup> (0-20 μM). Condition: ethanol/H<sub>2</sub>O (1:1, v/v, 25 °C) solution, λ<sub>ex</sub> = 530 nm.

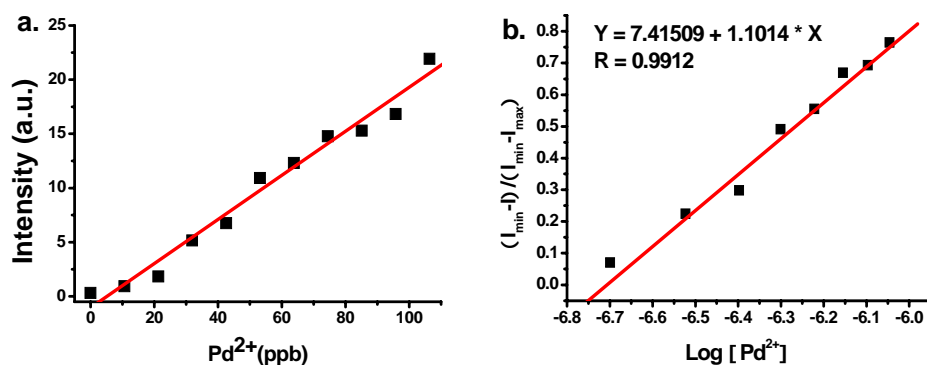

**Fig. S3.** a, fluorescence intensity at 580 nm of **RPd1** (10  $\mu\text{M}$ ) upon addition of  $\text{Pd}^{2+}$  (0-106.4 ppb, 1.0  $\mu\text{M}$  of  $\text{Pd}^{2+}$  in the form of  $\text{PdCl}_2$  is equal to 106.4 ppb of  $\text{Pd}^{2+}$ ). b, normalized response of the fluorescence signal to changing  $\text{Pd}^{2+}$  concentrations. A linear regression curve was then fitted to these normalized fluorescence intensity data, and the point at which this line crossed the ordinate axis was considered as the detection limit ( $1.85 \times 10^{-7} \text{M}$ ).<sup>3</sup>  $Y = 7.41509 + 1.1014 * X$ ,  $R = 0.9912$ .

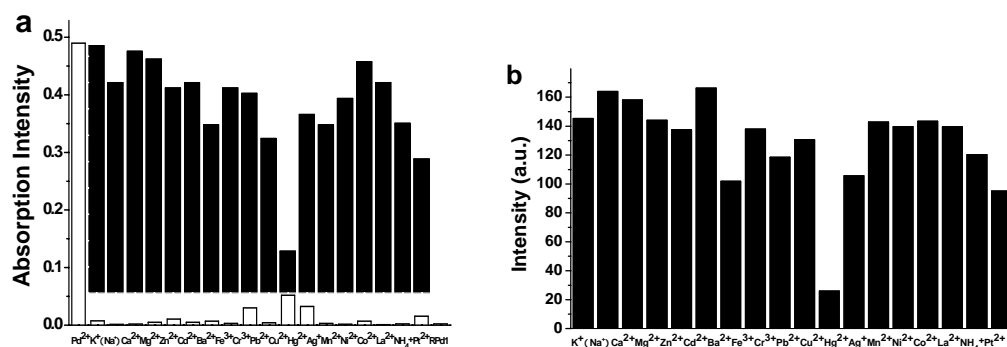

**Fig. S4.** Absorption (a, at 560 nm) and fluorescence (b, 580 nm) responses of **RPd1** (10  $\mu\text{M}$ ) to miscellaneous cations. White bars represent **RPd1** only and **RPd1** + cations; Black bars represent **RPd1** +  $\text{Pd}^{2+}$  in the presence of other cations (10  $\mu\text{M}$  for  $\text{Pd}^{2+}$  and 50  $\mu\text{M}$  for others). Condition: ethanol/ $\text{H}_2\text{O}$  (1:1, v/v, 25  $^\circ\text{C}$ ) solution,  $\lambda_{\text{ex}} = 530 \text{ nm}$ .

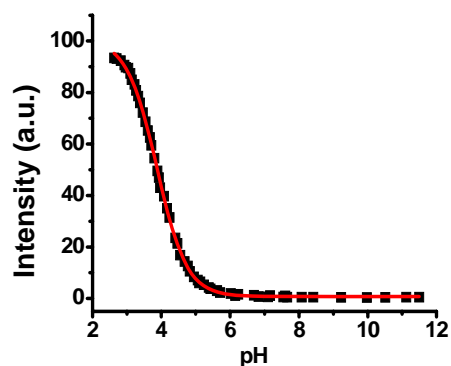

**Fig. S5.** Influence of pH on fluorescence at 580 nm for **RPd1** (10  $\mu\text{M}$ ) in ethanol

aqueous solution,  $\lambda_{\text{ex}} = 530$  nm. The pH of solution was adjusted by aqueous solution of NaOH (1 M) or HCl (1 M).

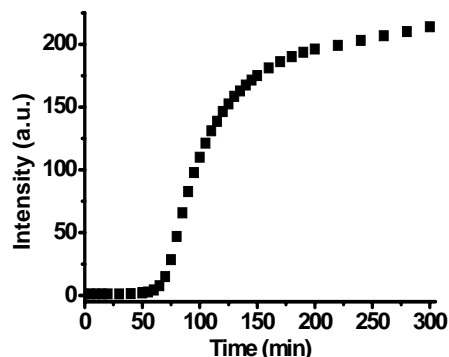

**Fig. S6.** Time dependent fluorescence intensity (at 580 nm) changes of **RPd1** (10  $\mu\text{M}$ ) with 1.0 equiv of  $\text{Pd}^{2+}$  in ethanol/ $\text{H}_2\text{O}$  (1:1, v/v, contained 100  $\mu\text{M}$   $\text{PPh}_3$ , 25  $^\circ\text{C}$ ),  $\lambda_{\text{ex}} = 530$  nm.

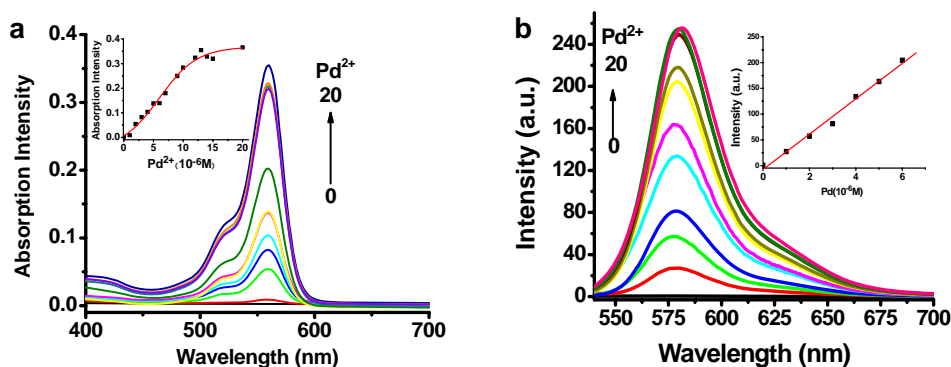

**Fig. S7.** Absorption (a) and fluorescence (b) spectral changes of **RPd1** (10  $\mu\text{M}$ ) upon addition of  $\text{Pd}^{2+}$  (0-20  $\mu\text{M}$ ). Inset: a, absorption intensity at 560 nm (0-20  $\mu\text{M}$ ); b, fluorescence intensity at 580 nm (0-6  $\mu\text{M}$ ). Condition: ethanol/ $\text{H}_2\text{O}$  (1:1, v/v, contained 100  $\mu\text{M}$   $\text{PPh}_3$ , 25  $^\circ\text{C}$ ) solution,  $\lambda_{\text{ex}} = 530$  nm.

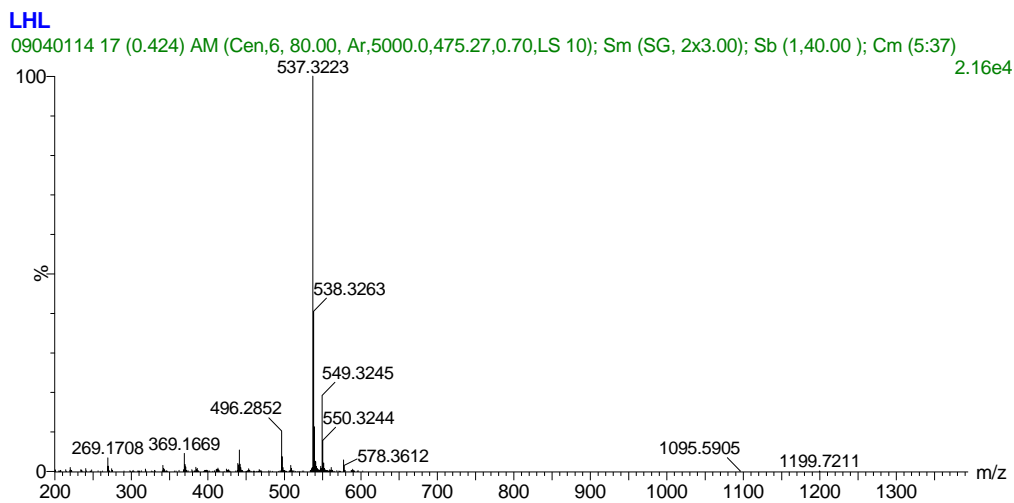

**Fig. S8.** TOF-MS of **RPd1**.

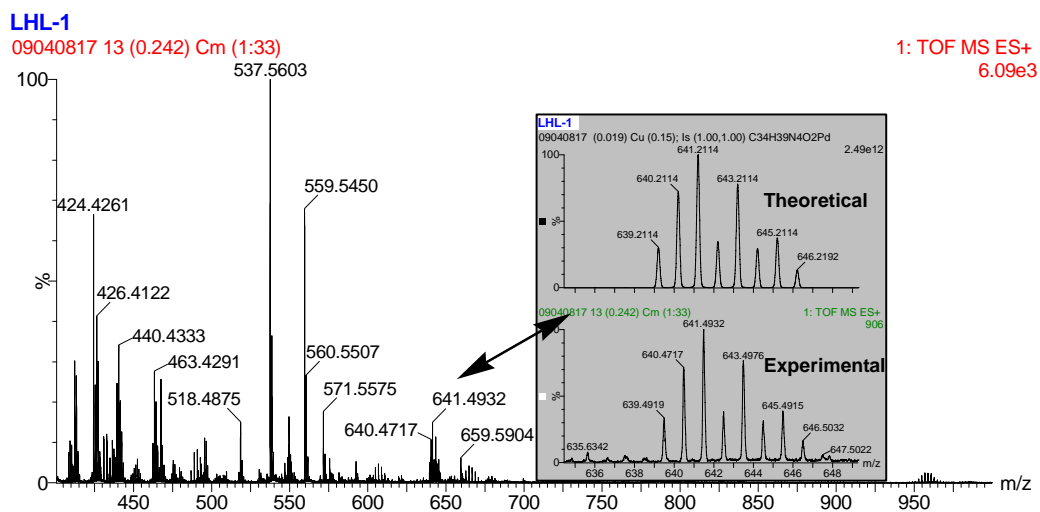

**Fig. S9.** TOF-MS of **RPd1 + PdCl<sub>2</sub>: [RPd1 + Pd<sup>2+</sup> - H<sup>+</sup>]<sup>+</sup>**.

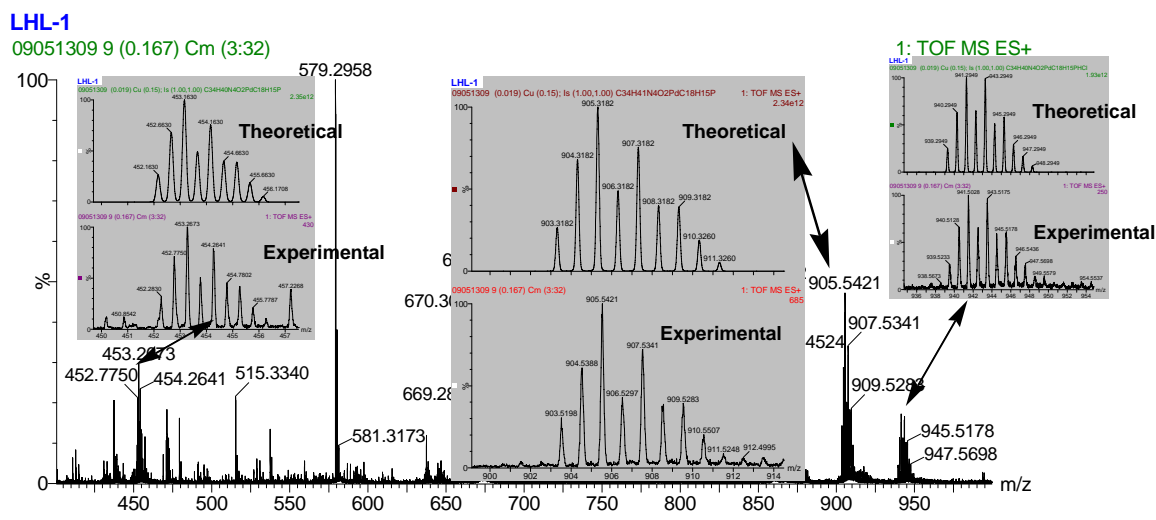

**Fig. S10.** TOF-MS of  $\text{RPd1} + \text{PdCl}_2 + \text{PPh}_3$ :  $[\text{RPd1} + \text{Pd}^0 + \text{PPh}_3 + 2\text{H}^+]^{2+}$ ,  $[\text{RPd1} + \text{Pd}^0 + \text{PPh}_3 + \text{H}^+]^+$ ,  $[\text{RPd1} + \text{Pd}^0 + \text{PPh}_3 + \text{HCl} + \text{H}^+]^+$ .

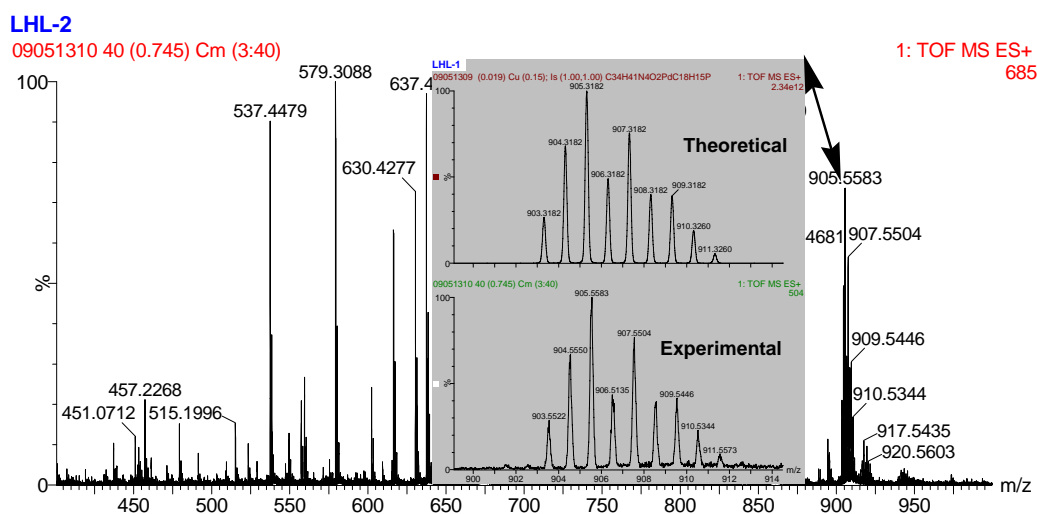

**Fig. S11.** TOF-MS of  $\text{RPd1} + \text{Pd}(\text{PPh}_3)_4$ :  $[\text{RPd1} + \text{Pd}^0 + \text{PPh}_3 + \text{H}^+]^+$ .

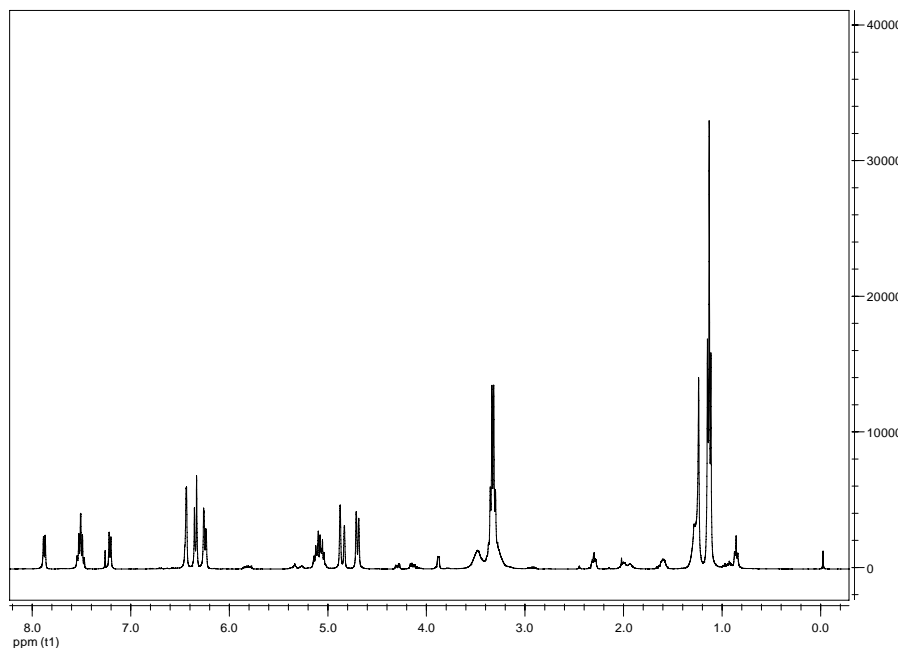

**Fig. S12.** <sup>1</sup>H-NMR of **RPd1**.

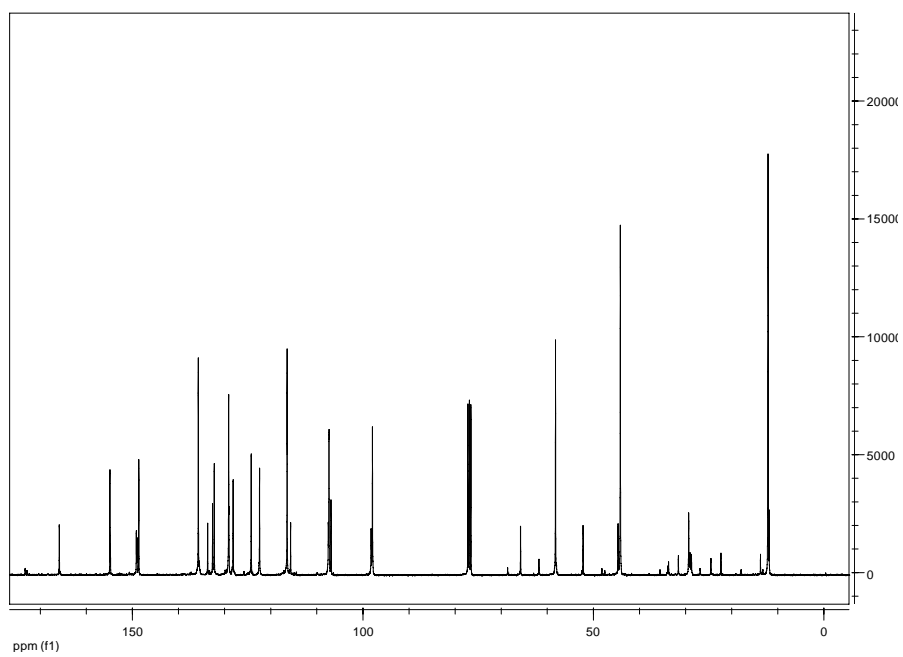

**Fig. S13.** <sup>13</sup>C-NMR of **RPd1**.



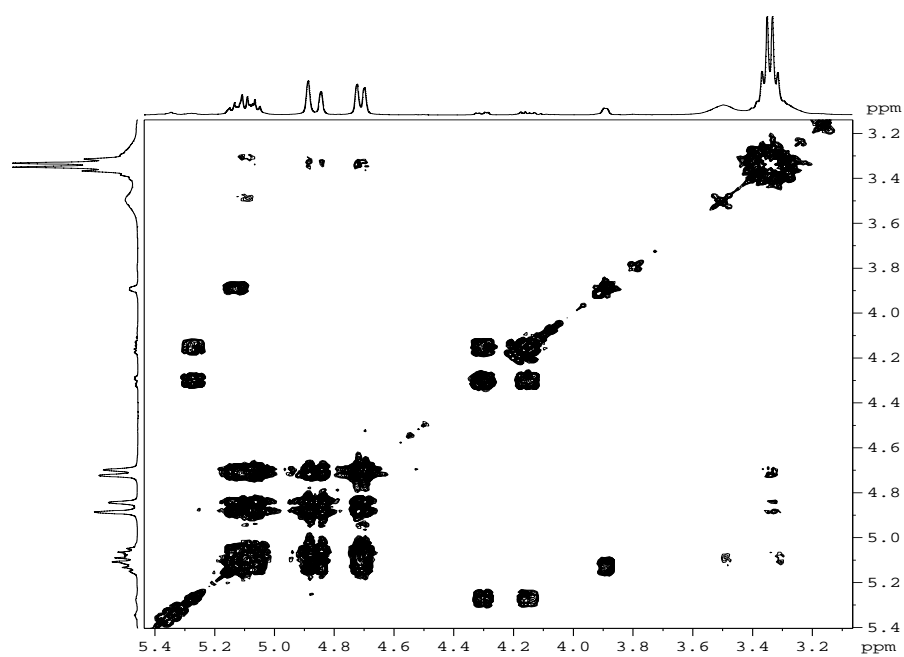

**Fig. S14.**  $^1\text{H}$ - $^1\text{H}$  COSY of **RPd1**.

### References:

1. K. G. Casey and E. L. Quitevis, *J. Phys. Chem.*, 1988, **92**, 6590.
2. X. F. Yang, X. Q. Guo and Y. B. Zhao, *Talanta*, 2002, **57**, 883.
3. M. Shortreed, R. Kopelman, M. Kuhn and B. Hoyland, *Anal. Chem.*, 1996, **68**, 1414.
